# Supplementary material for: Activin A–Mediated Polarization of Cancer-Associated Fibroblasts and Macrophages Confers Resistance to Checkpoint Immunotherapy in Skin Cancer
Source: PubMed Central journal article supplement — Clin Cancer Res. 2023 Jun 16;29(17):3498–513. doi: 10.1158/1078-0432.CCR-23-0219 (PMC10472111; doi:10.1158/1078-0432.ccr-23-0219), 2023-06-16
Supplement: ccr-23-0219_supplementary_figure_s7_suppfs7.pdf [file ccr-23-0219_supplementary_figure_s7_suppfs7.pdf]

**A**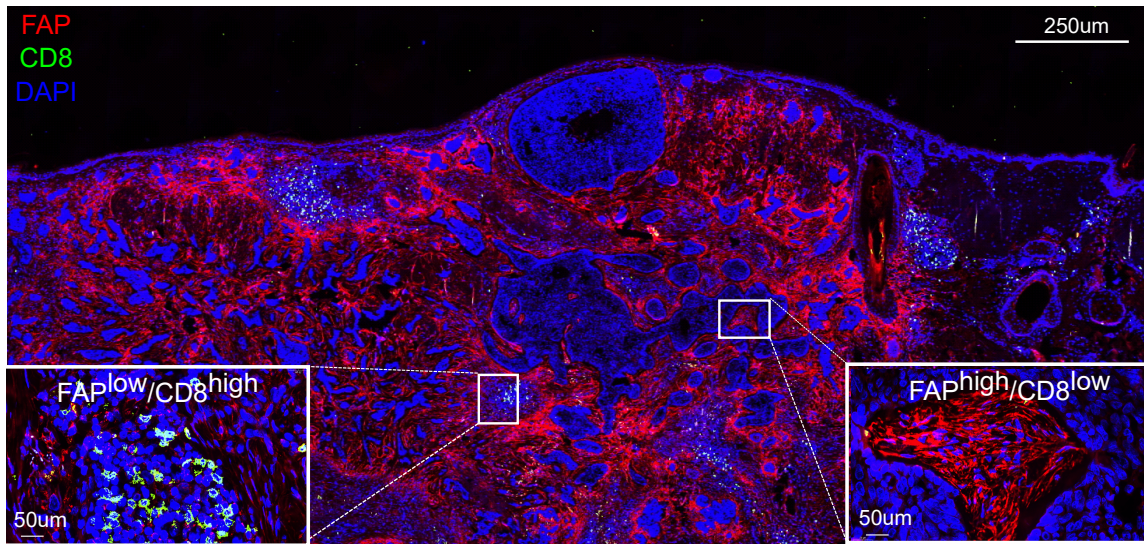**B**

scRNAseq Myeloid cells huBCC

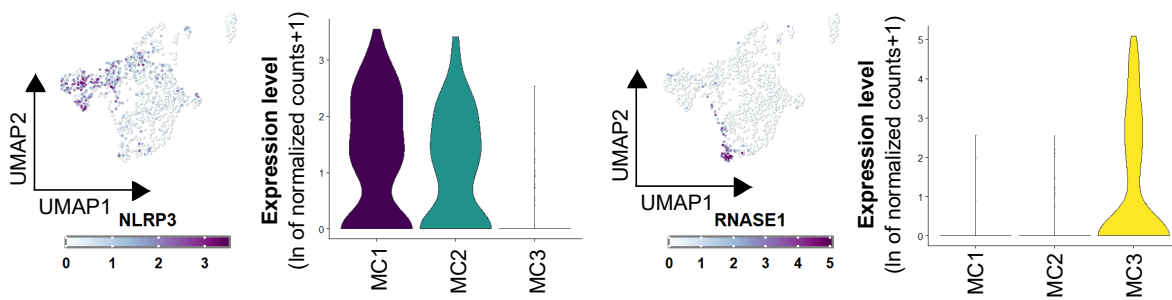**C**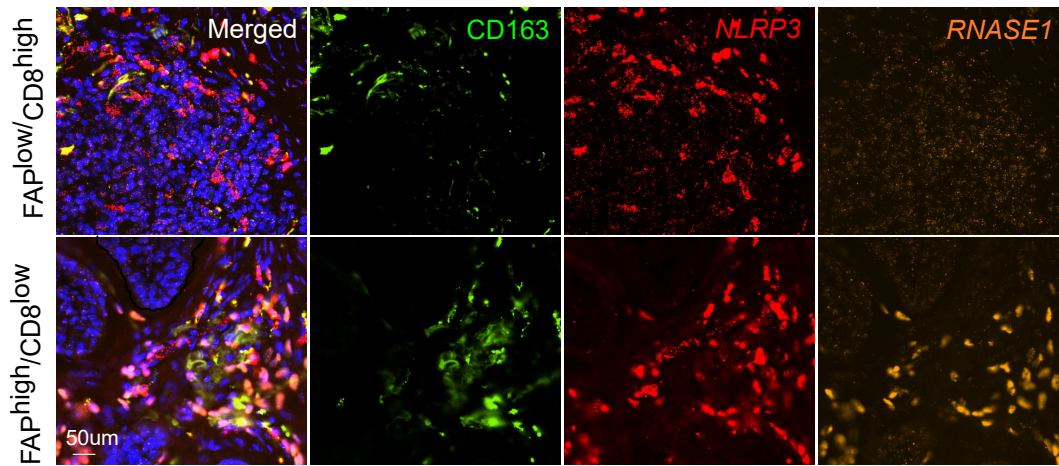

**Supplementary Figure S7: ECM-remodeling CAFs and macrophages co-localize in CD8 T cells-depleted areas.**

**A)** Representative scan images of a huBCC stained with DAPI (blue), FAP (red) and CD8 (green). Lower left zoom highlights a FAP<sup>low</sup>/CD8<sup>high</sup> area, while lower right zoom highlights a FAP<sup>high</sup>/CD8<sup>low</sup> area. Scale bars indicate 250µm (main panel) and 50µm (zoom panels).

**B)** Expression level of MC1 (*NLRP3*) and MC3 (*RNASE1*) cluster markers in the Macrophages subpopulation, represented as a color scale overlaid UMAP plot and violin plots.

**C)** Representative scan images of a human BCC stained with DAPI (blue), CD163 (green), and *NLRP3* (red) and *RNASE1* probes for RNA FISH in both FAP<sup>low</sup>/CD8<sup>high</sup> area (upper panels) and FAP<sup>high</sup>/CD8<sup>low</sup> area (lower panels).
