# Supplementary material for: Activin A–Mediated Polarization of Cancer-Associated Fibroblasts and Macrophages Confers Resistance to Checkpoint Immunotherapy in Skin Cancer
Source: PubMed Central journal article supplement — Clin Cancer Res. 2023 Jun 16;29(17):3498–513. doi: 10.1158/1078-0432.CCR-23-0219 (PMC10472111; doi:10.1158/1078-0432.ccr-23-0219), 2023-06-16
Supplement: ccr-23-0219_supplementary_figure_s11_suppfs11.pdf [file ccr-23-0219_supplementary_figure_s11_suppfs11.pdf]

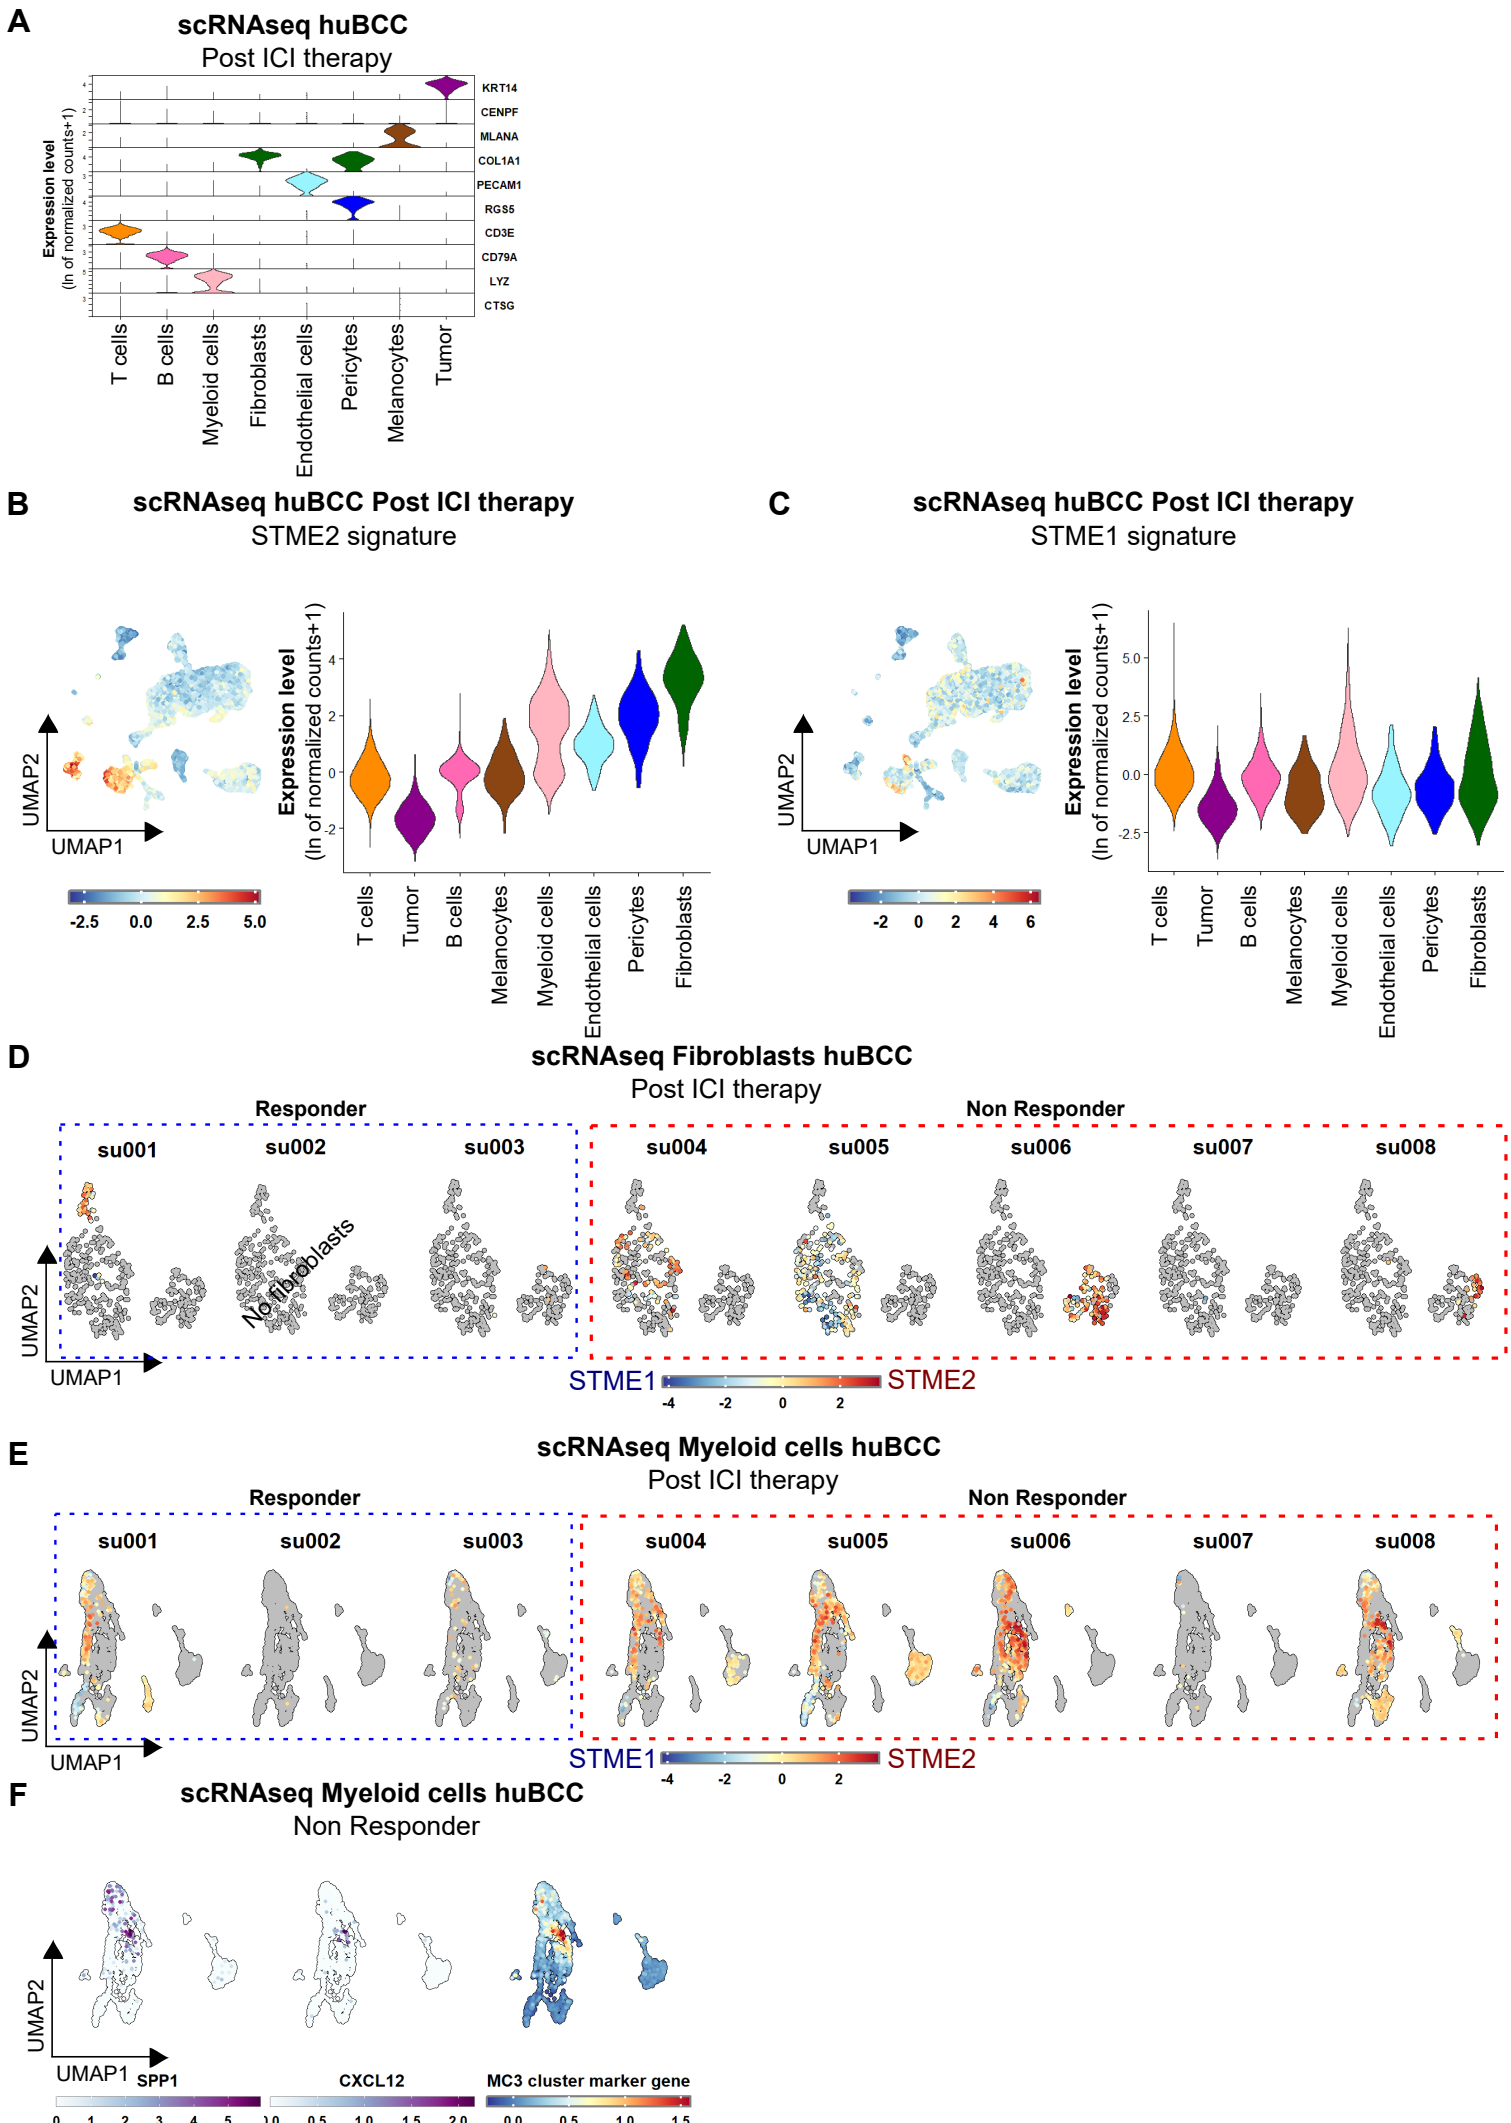

**Supplementary Figure S11. ICI-resistant BCC harbour higher levels of TME2-like CAFs and myeloid cells.**

**Supplementary Figure S11: ICI-resistant BCCs harbor higher levels of TME2-like CAFs and myeloid cells.**

**A)** Expression level of canonical cell type markers in single cells from eight ICI-treated human BCCs represented as violin plots.

**B)** Average expression level of the STME2 signature in single cells of eight ICI-treated huBCC samples, represented as a color scale overlaid on the UMAP (left panel) and as violin plots per cell type ranked according to Fig. 6C (right panel).

**C)** Average expression level of the STME1 signature in single cells of eight ICI-treated huBCC samples, represented as a color scale overlaid on the UMAP (left panel) and as violin plots per cell type ranked according to Fig. 6C (right panel).

**D)** Average expression level of the difference between STME2 and STME1 signature scores in Fibroblasts populations of individual ICI-treated BCC samples, represented as a color scale overlaid UMAP plot.

**E)** Average expression level of the difference between STME2 and STME1 signature scores in Myeloid cell populations of individual ICI-treated BCC samples, represented as a color scale overlaid UMAP plot.

**F)** Expression level of *SPP1*, *CXCL12* and the MC3 cluster marker genes in the Myeloid cell populations of Non Responder BCC samples, represented as a color scale overlaid UMAP plot.
